# Supplementary material for: Photoisomerization-induced stable liquid crystalline cubic blue phase
Source: Royal Society of Chemistry journal article supplement (doi:10.1039/c2cc34114j), 2012-01-01
Supplement: c2cc34114j.pdf [file c2cc34114j.pdf]

### Photoisomerization-induced Stable Liquid Crystalline Cubic Blue Phase

Min-Jun Gim,<sup>a</sup> Sung-Taek Hur,<sup>a</sup> Kyung-Won Park,<sup>a</sup> Mongryong Lee,<sup>a</sup> Suk-Won Choi,<sup>a\*</sup> and Hideo Takezoe<sup>b\*</sup>

<sup>a</sup> Department of Advanced Materials Engineering for Information & Electronics, Kyung Hee University, Deogyong-daero, Yongin, Gyeonggi-do 446-701, Republic of Korea. Fax: (+82) 31-201-2256; E-mail: schoi@khu.ac.kr

<sup>b</sup> Department of Organic and Polymeric Materials, Tokyo Institute of Technology, O-okayama, Meguro, Tokyo 152-8552, Japan; E-mail: takezoe.h.aa@m.titech.ac.jp

For further understanding the temperature range of LC phase, thermal behavior was investigated using differential scanning calorimetry (DSC) equipped with a UV spot-cure system. Thermal flow was checked during heating process (1.5 °C/min). The UV light (40 mW/cm<sup>2</sup>) was impulsively irradiated to the sample pan at 90 °C during 10 min. After that, the UV light was gradually ceased. Fig. S1 shows the DSC data before and after the UV irradiation at 90 °C in mixtures of host LC and 20 wt% S811 during the heating process. As can be seen from Fig. S1(a), cubic BP transition from N\* was not clearly observed on heating process before UV irradiation because the transition peaks from N\* to cubic BP and from cubic BP to Iso are very small and moreover overlapped. However, photoinduced cubic BP according to the UV irradiation at 90 °C was maintained until 116 °C on heating process. (Fig. S1(b)) These DSC results are consistent to POM results.

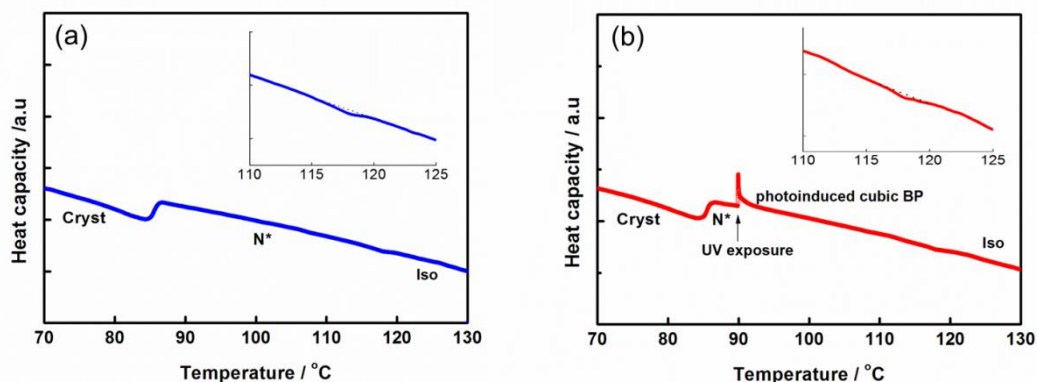

Fig. S1 DSC data of a mixture blended with 20 wt% of the chiral dopant (a) before and (b) after the UV irradiation at 90 °C during heating process.
